# Supplementary material for: Autonomous Droplet Microfluidic Design Framework with Large Language Models
Source: Research Square preprint supplement (doi:10.21203/rs.3.rs-6282521/v1), 2025-03-28
Supplement: Supplementary file 1 [file 0d96fa71a8f64c775cb6abbc.docx]

**Electronic Supplementary Information (ESI)**

1. Performance Prediction

1.1 Droplet diameter

Supplementary Fig.1. Comparison of mean squared error (MSE) across models for droplet diameter

Supplementary Fig.1 presents a comprehensive comparison of 16 models evaluated over 15 iterations, using mean squared error (MSE) as the performance metric. The combination of deep neural network (DNN) with DistilBERT and GPT-2 demonstrates a notable improvement**,** reducing the mean square error to approximately 13. The DNN model, along with its integration with SentenceTransformer, initially shows an error near 238, which gradually stabilizes around 150, indicating moderate improvement. In contrast, the support vector machine (SVM) exhibits poor performance, with an error persisting around 1139. Other models exhibit minor fluctuations.

Supplementary Fig.2. Comparison of coefficient of determination (R²) across models for droplet diameter

Supplementary Fig.2 provides a detailed comparison of 16 models evaluated over 15 iterations, using the coefficient of determination (R²) as the performance metric. The combination of the deep neural network (DNN) with DistilBERT and GPT-2 achieves high R² values, approaching 0.9967, indicating an excellent fit. The DNN model, as well as its integration with SentenceTransformer, achieves R² values around 0.98, indicating solid performance. In contrast, the support vector machine (SVM) exhibits a significantly lower R² of approximately 0.7178, reflecting poor predictive capability.

Supplementary Fig.3. Comparison of root mean squared error (RMSE) across models for droplet diameter

Supplementary Fig.3 presents a detailed comparison of 16 models assessed over 15 iterations, using root mean squared error (RMSE) as the performance metric. The combination of deep neural networks (DNN) with DistilBERT and GPT-2 demonstrates substantial accuracy improvement, with RMSE decreasing from approximately 9.28 to 3.26. In contrast, the support vector machine (SVM) exhibits poor performance, maintaining a high RMSE of around 33.39. The DNN model and its integration with SentenceTransformer show RMSE values starting below 15.31 and stabilizing around 10, reflecting moderate improvement. Other models display minor fluctuations.

Overall, the combination of DNN with DistilBERT and GPT-2 consistently shows the best performance across all metrics. In contrast, support vector machine (SVM) consistently performs poorly.

1.2 Droplet Generation Rate

Supplementary Fig.4. Comparison of mean squared error (MSE) across models for droplet generation rate

Supplementary Fig.4 provides a detailed comparison of 16 models evaluated over 15 iterations, using mean squared error (MSE) as the performance metric. The combination of the deep neural network (DNN) with DistilBERT and GPT-2 achieves a significant reduction in MSE to approximately 40, demonstrating substantial improvement. The DNN integrated with DistilBERT shows a moderate improvement, with a MSE around 750. In contrast, the support vector machine (SVM) combined with DistilBERT maintains a high MSE of approximately 7346, indicating poor performance. Other models exhibit minor variations.

Supplementary Fig.5. Comparison of coefficient of determination (R²) across models for droplet generation rate

Supplementary Fig.5 offers a detailed comparison of 16 models evaluated over 15 iterations, using the coefficient of determination (R²) as the performance metric. The deep neural network (DNN) combined with DistilBERT, GPT-2, and SentenceTransformer achieves high R² values nearing 0.9975, indicating an excellent fit. In contrast, the support vector machine (SVM) paired with DistilBERT exhibits a low R² of approximately 0.5664, reflecting poor predictive capability. Both XGBoost and LightGBM demonstrate decent performance, with R² values around 0.9113. Other models display moderate R² values.

Supplementary Fig.6. Comparison of root mean squared error (RMSE) across models for droplet generation rate.

Supplementary Fig.6 presents a detailed comparison of 16 models assessed over 15 iterations, using root mean squared error (RMSE) as the performance metric. The deep neural network (DNN) integrated with DistilBERT and GPT-2 demonstrates substantial accuracy improvement, with RMSE decreasing from around 20 to 4.92. In contrast, the combination of support vector machine (SVM) with DistilBERT exhibits poor accuracy, maintaining a high RMSE of around 84. The DNN paired with SentenceTransformer remains around 20, indicating moderate improvement. Other models show slight variations.

Overall, the deep neural network (DNN) integrated with DistilBERT and GPT-2 consistently demonstrates superior performance across all metrics, exhibiting significant improvements. SVM paired with DistilBERT consistently performs poorly.

1.3 Droplet Regime

Supplementary Fig.7. Comparison of F1 score across models for droplet regime

Supplementary Fig.7 provides a detailed comparison of 16 models evaluated over 15 iterations, using F1 score as the performance metric. The deep neural network (DNN) combined with DistilBERT consistently achieves the highest F1 score, approaching 1.0, indicating excellent performance. DNN paired with SentenceTransformer and GPT-2 also demonstrate strong performance, with F1 scores around 0.98. In contrast, the combination of XGBoost with DistilBERT shows the lowest performance, with an F1 score of approximately 0.92.

Supplementary Fig.8. Comparison of precision across models for droplet regime

Supplementary Fig.8 provides a detailed comparison of 16 models evaluated over 15 iterations, using precision as the performance metric. The deep neural network paired with DistilBERT maintains perfect precision across repetitions, indicating that its predictions are highly accurate. DNN paired with GPT-2 and DNN show strong precision as well. In contrast, XGBoost integrated with DistilBERT and SVM integrated with SentenceTransformer show the lowest precision, around 0.94.

Supplementary Fig.9. Comparison of recall across models for droplet regime

Supplementary Fig.9 presents a detailed comparison of 16 models evaluated over 15 iterations, using recall as the performance metric. The integration of the deep neural network (DNN) with DistilBERT leads with a recall value near 1. DNN models paired with SentenceTransformer and GPT-2 follow closely, achieving recall values around 0.98. The combination of XGBoost with DistilBERT exhibits the lowest recall, approximately 0.92.

Supplementary Fig.10. Comparison of ROC AUC across models for droplet regime

Supplementary Fig.10 presents a detailed comparison of 16 models evaluated over 15 iterations, using ROC AUC as the performance metric. The deep neural network (DNN) paired with DistilBERT achieves the highest ROC AUC, indicating excellent ability to distinguish between classes. DNN combined with GPT-2 and SentenceTransformer perform similarly well, with scores around 0.98. XGBoost integrated with DistilBERT exhibits the lowest ROC AUC, around 0.93.

Overall, deep neural network (DNN) paired with DistilBERT consistently outperforms other models across all metrics, demonstrating superior predictive capabilities. XGBoost integrated with DistilBERT, on the other hand, shows the least effective performance, particularly in precision and recall.

2. Design Automation

2.1 Droplet capillary number

Supplementary Fig.11. Comparison of mean squared error (MSE) across models for droplet capillary number

Supplementary Fig.11 provides a detailed comparison of 16 models evaluated over 15 iterations, using mean squared error (MSE) as the performance metric. Combination of deep neural network (DNN) with DistilBERT shows the lowest MSE, decreasing consistently as repetitions increase, indicating high accuracy and improving performance. DNN paired with GPT-2 and SentenceTransformer also demonstrates low MSE values. DistilBERT paired with XGBoost and LightGBM yields the highest MSE values, indicating less accurate predictions.

Supplementary Fig.12. Comparison of coefficient of determination (R²) across models for droplet capillary number

Supplementary Fig.12 provides a detailed comparison of 16 models evaluated over 15 iterations, using coefficient of determination (R²) as the performance metric. Combination of deep neural network (DNN) with DistilBERT consistently achieves the highest R² values, close to 1, indicating excellent generalization. DNN paired with GPT-2 and SentenceTransformer also perform well with high R² values. DistilBERT paired with XGBoost and LightGBM yields lower R² values, suggesting poorer model generalization.

Supplementary Fig.13. Comparison of root mean squared error (RMSE) across models for droplet capillary number

Supplementary Fig.13 provides a detailed comparison of 16 models evaluated over 15 iterations, using root mean squared error (RMSE) as the performance metric. Combination of deep neural network (DNN) with DistilBERT has the lowest RMSE, confirming its superior predictive accuracy. Similar trends are observed with combination of deep neural network (DNN) with GPT-2 and SentenceTransformer, showing competitive RMSE values. DistilBERT paired with XGBoost and LightGBM exhibits higher RMSE values, reflecting less precision.

Overall, DNN integrated with DistilBERT demonstrates exceptional performance across all metrics. In contrast, DistilBERT paired with XGBoost and LightGBM appears to be the least effective, with higher error rates.

2.2 Droplet aspect ratio

Supplementary Fig.14. Comparison of mean absolute error (MAE) across models for droplet aspect ratio

Supplementary Fig.14 provides a detailed comparison of 16 models evaluated over 15 iterations, using mean absolute error (MAE) as the performance metric. The deep neural network (DNN) integrated with SentenceTransformer and GPT-2 exhibits a clear decreasing trend in mean absolute error (MAE) over multiple repetitions, indicating improving accuracy. In contrast, the DNN paired with DistilBERT begins with a higher MAE but stabilizes quickly. Meanwhile, DistilBERT combined with XGBoost and LightGBM maintains consistent performance without notable improvement.

Supplementary Fig.15. Comparison of mean squared error (MSE) across models for droplet aspect ratio

Supplementary Fig.15 presents a detailed comparison of 16 models evaluated over 15 iterations, using mean squared error (MSE) as the performance metric. Deep neural network (DNN) paired with SentenceTransformer and GPT-2 demonstrate a significant reduction in MSE, reflecting enhanced predictive accuracy over time. Other models maintain consistent MSE values.

Supplementary Fig.16. Comparison of coefficient of determination (R²) across models for droplet aspect ratio

Supplementary Fig.16 presents a detailed comparison of 16 models evaluated over 15 iterations, using coefficient of determination (R²) as the performance metric. The deep neural network (DNN) combined with SentenceTransformer and GPT-2 exhibit a marked increase in R² values, indicating better model fit as repetitions increase. DNN paired with DistilBERT shows a gradual increase, suggesting improving performance. The remaining models have relatively stable R² values, indicating a consistent but less optimal fit.

Supplementary Fig.17. Comparison of root mean squared error (RMSE) across models for droplet aspect ratio

Supplementary Fig.17 presents a detailed comparison of 16 models evaluated over 15 iterations, using root mean squared error (RMSE) as the performance metric. The deep neural network (DNN) combined with SentenceTransformer and GPT-2 continue to show decreasing RMSE, aligning with their improving MSE and MAE. DNN combined with DistilBERT also improves, albeit at a slower pace. Other models remain stable, indicating less change in predictive error.

Overall, DNN combined with SentenceTransformer and GPT-2 show the most significant improvements across all error metrics. DNN combined with DistilBERT improves steadily, while other models remain more constant in their performance.

| Droplet Aspect Ratio | | | | |
| --- | --- | --- | --- | --- |
| Model | Metrics | | | |
| MAE | MSE | RMSE | R² |
| DNN | 0.5857 ± 0.0031 | 0.452 ± 0.0058 | 0.6739 ± 0.003 | 0.1078 ± 0.0052 |
| DNN-DistilBERT | 0.6297 ± 0.0134 | 0.5432 ± 0.0152 | 0.7356 ± 0.0101 | 0.0165 ± 0.0196 |
| DNN-OpenGPT-2 | 0.5708 ± 0.0149 | 0.4894 ± 0.0384 | 0.757 ± 0.0272 | 0.0349 ± 0.0805 |
| DNN-SentenceTransformer | 0.5834 ± 0.0245 | 0.4767 ± 0.0355 | 0.6858 ± 0.0254 | 0.2525 ± 0.0469 |
| LightGBM | 0.5519 ± 0.0038 | 0.4439 ± 0.0066 | 0.6647 ± 0.0046 | 0.1327 ± 0.0126 |
| LightGBM-DistilBERT | 0.5905 ± 0.004 | 0.4705 ± 0.0062 | 0.6853 ± 0.0046 | 0.0802 ± 0.0053 |
| LightGBM-OpenGPT-2 | 0.5629 ± 0.0031 | 0.4481 ± 0.0067 | 0.6687 ± 0.0034 | 0.1223 ± 0.0078 |
| LightGBM-SentenceTransformer | 0.6012 ± 0.0033 | 0.4792 ± 0.0062 | 0.6917 ± 0.0035 | 0.0641 ± 0.0049 |
| SVM | 0.547 ± 0.0036 | 0.4445 ± 0.0064 | 0.6653 ± 0.005 | 0.1296 ± 0.0111 |
| SVM-DistilBERT | 0.6091 ± 0.0035 | 0.4935 ± 0.0042 | 0.7019 ± 0.003 | 0.0353 ± 0.0044 |
| SVM-OpenGPT-2 | 0.5826 ± 0.0041 | 0.4649 ± 0.0086 | 0.681 ± 0.0058 | 0.0931 ± 0.0067 |
| SVM-SentenceTransformer | 0.6138 ± 0.0037 | 0.5005 ± 0.0055 | 0.7065 ± 0.0044 | 0.0234 ± 0.0189 |
| XGBoost | 0.548 ± 0.0038 | 0.4236 ± 0.0072 | 0.6499 ± 0.0056 | 0.1726 ± 0.0065 |
| XGBoost-DistilBERT | 0.6032 ± 0.0054 | 0.4825 ± 0.0063 | 0.694 ± 0.0046 | 0.0523 ± 0.0139 |
| XGBoost-OpenGPT-2 | 0.5785 ± 0.003 | 0.4563 ± 0.0065 | 0.6741 ± 0.0044 | 0.1134 ± 0.0226 |
| XGBoost-SentenceTransformer | 0.6016 ± 0.0036 | 0.4789 ± 0.006 | 0.692 ± 0.0036 | 0.0644 ± 0.0067 |

Supplementary table 1. Metrics evaluation across models for droplet aspect ratio

Supplementary table 1 presents a comparative analysis of various machine learning models, including deep neural networks (DNN), LightGBM, support vector machines (SVM), and XGBoost, along with their combinations with natural language processing (NLP) models such as DistilBERT, OpenGPT-2, and SentenceTransformer. The models are evaluated using standard regression metrics: mean absolute error (MAE), mean squared error (MSE), root mean squared error (RMSE), and R². XGBoost achieves R² of 0.1726 and the lowest MSE of 0.4236. DNN paired with SentenceTransformer marginally achieves the highest R² (0.2525). However, some models incorporating advanced transformers, such as DNN-DistilBERT, exhibit lower R² values. These results highlight the importance of selecting appropriate embeddings to enhance model performance.

2.3 Droplet Expansion Ratio

Supplementary Fig.18. Comparison of mean absolute error (MAE) across models for droplet expansion ratio

Supplementary Fig.18 presents a detailed comparison of 16 models evaluated over 15 iterations, using mean absolute error (MAE) as the performance metric. The deep neural network (DNN) paired with SentenceTransformer shows a significant decrease in MAE, indicating improved accuracy over repetitions. DNN paired with DistilBERT and GPT-2 also decreases steadily but at a slower rate. Others remain relatively stable, indicating consistent performance without much improvement.

Supplementary Fig.19. Comparison of mean squared error (MSE) across models for droplet expansion ratio

Supplementary Fig.19 presents a detailed comparison of 16 models evaluated over 15 iterations, using mean squared error (MSE) as the performance metric. The deep neural network (DNN) paired with SentenceTransformer again demonstrates the largest reduction in MSE, suggesting enhanced predictive accuracy. DNN paired with DistilBERT and GPT-2 shows improvement. Other models have higher and more stable MSE values, indicating less change over repetitions.

Supplementary Fig.20. Comparison of coefficient of determination (R²) across models for droplet expansion ratio

Supplementary Fig.20 presents a detailed comparison of 16 models evaluated over 15 iterations, using coefficient of determination (R²) as the performance metric. The deep neural network (DNN) combined with SentenceTransformer exhibits the highest increase in R² values, indicating a better fit with increased repetitions. DNN paired with DistilBERT and GPT-2 shows moderate improvement in R². Other models maintain relatively low R² values, indicating less effective.

Supplementary Fig.21. Comparison of root mean squared error (RMSE) across models for droplet expansion ratio

Supplementary Fig.21 presents a detailed comparison of 16 models evaluated over 15 iterations, using root mean squared error (RMSE) as the performance metric. The deep neural network (DNN) combined with SentenceTransformer shows the greatest decrease in RMSE, confirming its improving accuracy. DNN paired with DistilBERT and GPT-2 follows with a slower decrease. Other models remain stable with higher RMSE values.

Overall, DNN combined with SentenceTransformer consistently outperforms other models across all metrics, showing significant improvement with more repetitions. DNN paired with DistilBERT also improves. The remaining models show minimal change, indicating stable but less optimal performance.

| Droplet Expansion Ratio | | | | |
| --- | --- | --- | --- | --- |
| Model | Metrics | | | |
| MAE | MSE | RMSE | R² |
| DNN | 1.1633 ± 0.0139 | 1.8233 ± 0.0648 | 1.3629 ± 0.0100 | 0.0639 ± 0.0139 |
| DNN-DistilBERT | 0.7467 ± 0.0104 | 0.8452 ± 0.0240 | 1.0909 ± 0.0338 | 0.1329 ± 0.0423 |
| DNN-OpenGPT-2 | 0.8984 ± 0.0236 | 1.7985 ± 0.0643 | 1.2786 ± 0.0244 | 0.2354 ± 0.0321 |
| DNN-SentenceTransformer | 0.1021 ± 0.0179 | 0.0786 ± 0.0335 | 0.1506 ± 0.0225 | 0.9592 ± 0.0175 |
| LightGBM | 1.1109 ± 0.0061 | 1.7767 ± 0.0162 | 1.3308 ± 0.0061 | 0.1007 ± 0.0155 |
| LightGBM-DistilBERT | 1.1674 ± 0.0103 | 1.8706 ± 0.0242 | 1.3663 ± 0.0088 | 0.0600 ± 0.0053 |
| LightGBM-OpenGPT-2 | 1.0968 ± 0.0078 | 1.6855 ± 0.0158 | 1.2974 ± 0.0073 | 0.1494 ± 0.0098 |
| LightGBM-SentenceTransformer | 1.1462 ± 0.0155 | 1.8000 ± 0.0408 | 1.3408 ± 0.0152 | 0.0954 ± 0.0056 |
| SVM | 1.0991 ± 0.0067 | 1.7628 ± 0.0169 | 1.3257 ± 0.0064 | 0.1103 ± 0.0116 |
| SVM-DistilBERT | 1.1697 ± 0.0122 | 1.9209 ± 0.0252 | 1.3845 ± 0.0091 | 0.0328 ± 0.0061 |
| SVM-OpenGPT-2 | 1.1072 ± 0.0061 | 1.7918 ± 0.0327 | 1.3358 ± 0.0122 | 0.0997 ± 0.0088 |
| SVM-SentenceTransformer | 1.1376 ± 0.0126 | 1.8161 ± 0.0261 | 1.3466 ± 0.0098 | 0.0809 ± 0.0094 |
| XGBoost | 1.0923 ± 0.0081 | 1.6471 ± 0.0189 | 1.2823 ± 0.0074 | 0.1672 ± 0.0083 |
| XGBoost-DistilBERT | 1.1742 ± 0.0104 | 1.8856 ± 0.0291 | 1.3719 ± 0.0106 | 0.0524 ± 0.0054 |
| XGBoost-OpenGPT-2 | 1.1114 ± 0.0057 | 1.7135 ± 0.0234 | 1.3094 ± 0.0144 | 0.1391 ± 0.0063 |
| XGBoost-SentenceTransformer | 1.1410 ± 0.0093 | 1.7705 ± 0.0233 | 1.3297 ± 0.0087 | 0.1058 ± 0.0068 |

Supplementary table 2. Metrics evaluation across models for droplet expansion ratio

Supplementary table 2 provides a detailed performance comparison of various machine learning models (DNN, LightGBM, SVM, XGBoost) combined with natural language processing models (DistilBERT, OpenGPT-2, SentenceTransformer) across regression tasks, using metrics such as mean absolute error (MAE), mean squared error (MSE), root mean squared error (RMSE), and R². Notably, DNN-SentenceTransformer exhibits the highest performance, with a remarkable R² of 0.9592, significantly outperforming other combinations. This suggests that SentenceTransformer integrates more effectively with DNN for this task, producing highly accurate predictions (MAE = 0.1021). On the other hand, most models, especially those incorporating DistilBERT and OpenGPT-2, tend to underperform. For instance, XGBoost-DistilBERT shows a relatively high error (MAE = 1.1742, RMSE = 1.3719) and a poor R² (0.0524), indicating that these combinations do not significantly improve model performance. Interestingly, the base versions of LightGBM and XGBoost also perform competitively, with XGBoost achieving a balanced performance (MAE = 1.0923, R² = 0.1672). Overall, the table highlights that while some NLP models such as SentenceTransformer provide a substantial boost to performance, others may introduce complexity without enhancing predictive accuracy, underscoring the importance of careful model selection and optimization.

2.4 Droplet Flow Rate Ratio

Supplementary Fig.22. Comparison of mean absolute error (MAE) across models for droplet flow rate ratio

Supplementary Fig.22 presents a detailed comparison of 16 models evaluated over 15 iterations, using mean absolute error (MAE) as the performance metric. The deep neural network paired with GPT-2 shows a significant decrease in MAE over repetitions, indicating improved accuracy. DNN combined with SentenceTransformer also shows improvement. The remaining models show minimal change.

Supplementary Fig.23. Comparison of mean squared error (MSE) across models for droplet flow rate ratio

Supplementary Fig.23 presents a detailed comparison of 16 models evaluated over 15 iterations, using mean squared error (MSE) as the performance metric. Combination of deep neural network (DNN) with GPT-2 and SentenceTransformer demonstrates the most substantial reduction in MSE, suggesting enhanced predictive accuracy. DNN paired with DistilBERT follows with a noticeable decrease. Other models show higher and more stable MSE values, indicating less change over repetitions.

Supplementary Fig.24. Comparison of coefficient of determination (R²) across models for droplet flow rate ratio

Supplementary Fig.24 presents a detailed comparison of 16 models evaluated over 15 iterations, using coefficient of determination (R²) as the performance metric. Combination of deep neural network (DNN) with GPT-2 and SentenceTransformer exhibits the highest increase in R², signaling a better fit with more repetitions. DNN paired with DistilBERT also shows improvement. Others maintain relatively low R² values, indicating less effective.

Supplementary Fig.25. Comparison of root mean squared error (RMSE) across models for droplet flow rate ratio

Supplementary Fig.25 presents a detailed comparison of 16 models evaluated over 15 iterations, using root mean squared error (RMSE) as the performance metric. The deep neural network (DNN) paired with SentenceTransformer shows the greatest decrease in RMSE, confirming its improving accuracy. DNN paired with DistilBERT and GPT-2 also decrease steadily. Other models remain stable with higher RMSE values.

Overall, combination of deep neural network (DNN) with GPT-2 and SentenceTransformer consistently outperforms other models across all metrics, showing significant improvement with more repetitions. DNN paired with DistilBERT improves as well, but not as dramatically. The remaining models show minimal change, indicating stable but less optimal performance.

| Droplet Flow Rate Ratio | | | | |
| --- | --- | --- | --- | --- |
| Model | Metrics | | | |
| MAE | MSE | RMSE | R² |
| DNN | 3.3707 ± 0.0378 | 17.3107 ± 0.3242 | 4.1514 ± 0.0392 | 0.4277 ± 0.0143 |
| DNN-DistilBERT | 2.792 ± 0.146 | 7.4 ± 0.8237 | 3.2137 ± 0.1543 | 0.7477 ± 0.0297 |
| DNN-OpenGPT-2 | 1.8469 ± 0.0416 | 4.7521 ± 0.2412 | 2.1161 ± 0.0428 | 0.8384 ± 0.0089 |
| DNN-SentenceTransformer | 4.0332 ± 0.0532 | 23.0771 ± 0.571 | 4.8002 ± 0.0592 | 0.2084 ± 0.0441 |
| LightGBM | 3.7646 ± 0.0234 | 21.1782 ± 0.6478 | 4.6299 ± 0.0477 | 0.272 ± 0.0091 |
| LightGBM-DistilBERT | 4.2453 ± 0.0271 | 25.9238 ± 0.5759 | 5.0854 ± 0.0558 | 0.1425 ± 0.0062 |
| LightGBM-OpenGPT-2 | 3.9849 ± 0.0405 | 22.8623 ± 0.294 | 4.7746 ± 0.0305 | 0.2316 ± 0.0086 |
| LightGBM-SentenceTransformer | 4.3172 ± 0.0328 | 26.5776 ± 0.2527 | 5.1607 ± 0.05 | 0.1062 ± 0.0087 |
| SVM | 3.8355 ± 0.022 | 21.629 ± 0.292 | 4.6488 ± 0.0209 | 0.2646 ± 0.0317 |
| SVM-DistilBERT | 4.2366 ± 0.0267 | 26.4881 ± 0.3944 | 5.1301 ± 0.0364 | 0.1079 ± 0.0124 |
| SVM-OpenGPT-2 | 3.9425 ± 0.0515 | 22.9605 ± 0.3874 | 4.7823 ± 0.033 | 0.2224 ± 0.0158 |
| SVM-SentenceTransformer | 4.3133 ± 0.0279 | 26.931 ± 0.3149 | 5.1841 ± 0.0306 | 0.0907 ± 0.0158 |
| XGBoost | 3.7952 ± 0.0235 | 20.4703 ± 0.1959 | 4.5171 ± 0.0212 | 0.3109 ± 0.0072 |
| XGBoost-DistilBERT | 4.2383 ± 0.0273 | 25.5001 ± 0.2716 | 5.0418 ± 0.027 | 0.1456 ± 0.007 |
| XGBoost-OpenGPT-2 | 4.0458 ± 0.0209 | 22.9177 ± 0.2481 | 4.7885 ± 0.0269 | 0.228 ± 0.0078 |
| XGBoost-SentenceTransformer | 4.3213 ± 0.0256 | 26.3464 ± 0.2421 | 5.1247 ± 0.0236 | 0.1154 ± 0.0075 |

Supplementary table 3. Metrics evaluation across models for droplet flow rate ratio

Supplementary table 3 presents a comprehensive evaluation of machine learning models (DNN, LightGBM, SVM, XGBoost) paired with various natural language processing models (DistilBERT, OpenGPT-2, SentenceTransformer), based on performance metrics such as mean absolute error (MAE), mean squared error (MSE), root mean squared error (RMSE), and R². Among the models, DNN-OpenGPT-2 exhibits the best overall performance, with the lowest MAE (1.8469), MSE (4.7521), and RMSE (2.1161), along with a high R² value (0.8384), indicating strong predictive power. In contrast, models like DNN-SentenceTransformer show poor performance with a high MSE (23.0771) and RMSE (4.8002), as well as an R² of 0.2084, reflecting weak predictive capabilities. Interestingly, adding NLP models like DistilBERT and SentenceTransformer to models such as LightGBM and SVM tends to degrade performance, with higher error rates and lower R² values, indicating that these combinations may not be optimal for enhancing predictive accuracy. For example, SVM-DistilBERT yields a high MAE (4.2366) and a low R² (0.1079). These results highlight the importance of carefully selecting and optimizing both machine learning models and NLP components to achieve the best results.

2.5 Droplet Normalized Oil Inlet

Supplementary Fig.26. Comparison of mean absolute error (MAE) across models for droplet normalized oil inlet

Supplementary Fig.26 presents a detailed comparison of 16 models evaluated over 15 iterations, using mean absolute error (MAE) as the performance metric. Combination of deep neural network (DNN) with SentenceTransformer has the lowest MAE, decreasing from around 0.5 to 0.1 as repetitions increase. DNN paired with GPT-2 starts at about 0.5 and decreases to about 0.3, showing improvement. DNN paired with DistilBERT remains relatively stable, starting at about 0.6 and slightly decreasing to below 0.5.

Supplementary Fig.27. Comparison of mean squared error (MSE) across models for droplet normalized oil inlet.

Supplementary Fig.27 presents a detailed comparison of 16 models evaluated over 15 iterations, using mean squared error (MSE) as the performance metric. Combination of deep neural network (DNN) with SentenceTransformer shows a significant reduction from approximately 0.3 to 0.05, indicating strong improvement. DNN paired with GPT-2 decreases from around 0.4 to 0.1. DNN paired with DistilBERT shows a slight decrease from about 0.5 to 0.3.

Supplementary Fig.28. Comparison of coefficient of determination (R²) across models for droplet normalized oil inlet

Supplementary Fig.28 presents a detailed comparison of 16 models evaluated over 15 iterations, using coefficient of determination (R²) as the performance metric. Combination of deep neural network (DNN) with SentenceTransformer achieves the highest R², increasing from about 0.3 to 0.9. DNN paired with GPT-2 shows improvement from around 0.2 to above 0.8. DNN paired with DistilBERT remains low.

Supplementary Fig.29. Comparison of root mean squared error (RMSE) across models for droplet normalized oil inlet

Supplementary Fig.29 presents a detailed comparison of 16 models evaluated over 15 iterations, using root mean squared error (RMSE) as the performance metric. Combination of deep neural network (DNN) with SentenceTransformer decreases from approximately 0.6 to 0.15, confirming its improving accuracy. DNN paired with GPT-2 reduces from about 0.7 to around 0.3. DNN combined with DistilBERT remains relatively stable, with a slight decrease from 0.7 to 0.6.

Overall, combination of deep neural network (DNN) with SentenceTransformer consistently outperforms other models across all metrics, showing significant improvement with more repetitions. DNN paired with GPT-2 also improves but to a lesser extent. DNN combined with DistilBERT shows minimal change, indicating stable but less optimal performance.

| Droplet Normalized Oil Inlet | | | | |
| --- | --- | --- | --- | --- |
| Model | Metrics | | | |
| MAE | MSE | RMSE | R² |
| DNN | 0.592 ± 0.007 | 0.5374 ± 0.0104 | 0.7327 ± 0.0071 | -0.0052 ± 0.0194 |
| DNN-DistilBERT | 0.5433 ± 0.0076 | 0.4102 ± 0.0099 | 0.6511 ± 0.008 | -0.0141 ± 0.0247 |
| DNN-OpenGPT-2 | 0.5691 ± 0.0093 | 0.4369 ± 0.0125 | 0.6596 ± 0.0094 | 0.0909 ± 0.0222 |
| DNN-SentenceTransformer | 0.4779 ± 0.0322 | 0.3482 ± 0.0441 | 0.578 ± 0.0375 | 0.2771 ± 0.0878 |
| LightGBM | 0.5934 ± 0.0043 | 0.4688 ± 0.0135 | 0.6904 ± 0.0032 | 0.01 ± 0.0056 |
| LightGBM-DistilBERT | 0.5995 ± 0.0042 | 0.4792 ± 0.0042 | 0.6916 ± 0.003 | 0.0049 ± 0.0079 |
| LightGBM-OpenGPT-2 | 0.5926 ± 0.0038 | 0.4704 ± 0.0035 | 0.6851 ± 0.0025 | 0.0201 ± 0.0066 |
| LightGBM-SentenceTransformer | 0.5962 ± 0.0027 | 0.4805 ± 0.0035 | 0.6926 ± 0.0026 | 0.0027 ± 0.003 |
| SVM | 0.5695 ± 0.0061 | 0.4551 ± 0.0098 | 0.6742 ± 0.0073 | 0.0425 ± 0.0072 |
| SVM-DistilBERT | 0.601 ± 0.0032 | 0.4818 ± 0.0048 | 0.694 ± 0.0035 | -0.0006 ± 0.0052 |
| SVM-OpenGPT-2 | 0.5944 ± 0.0028 | 0.4764 ± 0.0035 | 0.6895 ± 0.0025 | 0.0229 ± 0.0132 |
| SVM-SentenceTransformer | 0.597 ± 0.0039 | 0.488 ± 0.0055 | 0.6981 ± 0.004 | -0.011 ± 0.0053 |
| XGBoost | 0.5872 ± 0.0031 | 0.4601 ± 0.0038 | 0.6782 ± 0.007 | 0.0463 ± 0.0033 |
| XGBoost-DistilBERT | 0.5972 ± 0.0032 | 0.4784 ± 0.0034 | 0.6907 ± 0.004 | 0.0085 ± 0.0021 |
| XGBoost-OpenGPT-2 | 0.5948 ± 0.003 | 0.4719 ± 0.0034 | 0.6863 ± 0.0025 | 0.0283 ± 0.0114 |
| XGBoost-SentenceTransformer | 0.5964 ± 0.0031 | 0.477 ± 0.0097 | 0.6903 ± 0.0071 | 0.0103 ± 0.0022 |

Supplementary table 4. Metrics evaluation across models for droplet normalized oil inlet

Supplementary table 4 presents a comprehensive evaluation of machine learning models (DNN, LightGBM, SVM, XGBoost) paired with various natural language processing models (DistilBERT, OpenGPT-2, SentenceTransformer), based on performance metrics such as mean absolute error (MAE), mean squared error (MSE), root mean squared error (RMSE), and R². Notably, the DNN-SentenceTransformer combination achieves the lowest MAE (0.4779) and the highest R² (0.2771), indicating superior performance in terms of accuracy and variance explanation. Conversely, the DNN model shows a negative R² (-0.0052), suggesting poor predictive capability. While LightGBM and XGBoost models generally perform well, the addition of embeddings does not consistently enhance their predictive power. The standard errors across models remain relatively low, indicating reliable estimates. However, the negative and low R² values in several configurations, such as SVM-DistilBERT.

2.6 Droplet Normalized Orifice Length

Supplementary Fig.30. Comparison of mean absolute error (MAE) across models for droplet normalized orifice length

Supplementary Fig.30 presents a detailed comparison of 16 models evaluated over 15 iterations, using mean absolute error (MAE) as the performance metric. Combination of deep neural network (DNN) with SentenceTransformer starts at approximately 0.6 and decreases to around 0.1 by the 15th repetition. DNN paired with GPT-2 begins at about 0.3 and reduces to just below 0.1. DNN integrated with DistilBERT decreases from around 0.35 to 0.15.

Supplementary Fig.31. Comparison of mean squared error (MSE) across models for droplet normalized orifice length

Supplementary Fig.31 presents a detailed comparison of 16 models evaluated over 15 iterations, using mean squared error (MSE) as the performance metric. Combination of deep neural network (DNN) with SentenceTransformer shows a significant drop from about 0.45 to below 0.1. DNN integrated with DistilBERT reduces from approximately 0.2 to below 0.05. DNN paired with GPT-2 shows a decrease from around 0.15 to below 0.05.

Supplementary Fig.32. Comparison of coefficient of determination (R²) across models for droplet normalized orifice length

Supplementary Fig.32 presents a detailed comparison of 16 models evaluated over 15 iterations, using coefficient of determination (R²) as the performance metric. The deep neural network (DNN) paired with GPT-2 achieves the highest R², increasing from around 0.8 to nearly 1.0. DNN integrated with DistilBERT improves from about 0.6 to approximately 1. DNN integrated with SentenceTransformer increases from approximately 0.2 to around 0.9.

Supplementary Fig.33. Comparison of root mean squared error (RMSE) across models for droplet normalized orifice length

Supplementary Fig.33 presents a detailed comparison of 16 models evaluated over 15 iterations, using root mean squared error (RMSE) as the performance metric. The deep neural network (DNN) paired with DistilBERT decreases from around 0.4 to 0.1. DNN combined with GPT-2 shows a reduction from about 0.3 to below 0.1. DNN combined with SentenceTransformer declines from around 0.65 to around 0.2.

Overall, DNN combined with GPT-2 consistently outperforms other models across all metrics, demonstrating substantial improvements with increased repetitions. While the DNN paired with DistilBERT also shows significant enhancement, it is less pronounced compared to the performance of DNN with GPT-2. The DNN integrated with SentenceTransformer exhibits steady improvement, though it remains less optimal compared to the DNN models paired with GPT-2 and DistilBERT.

| Droplet Normalized Orifice Length | | | | |
| --- | --- | --- | --- | --- |
| Model | Metrics | | | |
| MAE | MSE | RMSE | R² |
| DNN | 0.5475 ± 0.0044 | 0.4336 ± 0.0043 | 0.6645 ± 0.0063 | 0.166 ± 0.0076 |
| DNN-DistilBERT | 0.0726 ± 0.0068 | 0.0203 ± 0.0051 | 0.1018 ± 0.0089 | 0.961 ± 0.0099 |
| DNN-OpenGPT-2 | 0.0357 ± 0.0057 | 0.0128 ± 0.004 | 0.0653 ± 0.0076 | 0.975 ± 0.008 |
| DNN-SentenceTransformer | 0.4806 ± 0.0188 | 0.346 ± 0.0246 | 0.5805 ± 0.0213 | 0.3353 ± 0.0471 |
| LightGBM | 0.5732 ± 0.0035 | 0.4632 ± 0.0043 | 0.6767 ± 0.0111 | 0.1075 ± 0.0081 |
| LightGBM-DistilBERT | 0.6153 ± 0.0027 | 0.5013 ± 0.0034 | 0.7075 ± 0.0024 | 0.0329 ± 0.0058 |
| LightGBM-OpenGPT-2 | 0.6017 ± 0.0027 | 0.4806 ± 0.0031 | 0.6927 ± 0.0023 | 0.0795 ± 0.0091 |
| LightGBM-SentenceTransformer | 0.6135 ± 0.0025 | 0.5006 ± 0.0042 | 0.7071 ± 0.0024 | 0.0373 ± 0.0044 |
| SVM | 0.5608 ± 0.0039 | 0.4478 ± 0.0064 | 0.6694 ± 0.0033 | 0.137 ± 0.0112 |
| SVM-DistilBERT | 0.6155 ± 0.0029 | 0.5036 ± 0.0034 | 0.709 ± 0.0024 | 0.0325 ± 0.0037 |
| SVM-OpenGPT-2 | 0.6076 ± 0.0031 | 0.4895 ± 0.005 | 0.6995 ± 0.0036 | 0.0567 ± 0.0048 |
| SVM-SentenceTransformer | 0.611 ± 0.0031 | 0.5057 ± 0.0032 | 0.7106 ± 0.0023 | 0.0291 ± 0.0055 |
| XGBoost | 0.5667 ± 0.0031 | 0.443 ± 0.0041 | 0.6649 ± 0.0031 | 0.1474 ± 0.0069 |
| XGBoost-DistilBERT | 0.6133 ± 0.0027 | 0.4986 ± 0.0034 | 0.7056 ± 0.0024 | 0.0441 ± 0.0064 |
| XGBoost-OpenGPT-2 | 0.5978 ± 0.0034 | 0.4795 ± 0.0048 | 0.6921 ± 0.0035 | 0.0794 ± 0.0048 |
| XGBoost-SentenceTransformer | 0.6106 ± 0.0047 | 0.5006 ± 0.0031 | 0.7068 ± 0.0063 | 0.0385 ± 0.0037 |

Supplementary table 5. Metrics evaluation across models for droplet normalized orifice length

Supplementary table 5 presents a comprehensive evaluation of machine learning models (DNN, LightGBM, SVM, XGBoost) paired with various natural language processing models (DistilBERT, OpenGPT-2, SentenceTransformer), based on performance metrics such as mean absolute error (MAE), mean squared error (MSE), root mean squared error (RMSE), and R². The DNN-OpenGPT-2 model exhibits exceptional performance, achieving the lowest MAE (0.0357) and the highest R² (0.975), indicating a strong predictive capability and minimal error. In contrast, LightGBM and SVM models with embeddings show varied results, often with higher errors and lower R² values.

2.7 Droplet Normalized Water Inlet

Supplementary Fig.34. Comparison of mean absolute error (MAE) across models for droplet normalized water inlet

Supplementary Fig.34 presents a detailed comparison of 16 models evaluated over 15 iterations, using mean absolute error (MAE) as the performance metric. The deep neural network (DNN) paired with DistilBERT shows a significant decrease in MAE from 0.3 to about 0.05 over the repetitions, indicating high accuracy and improvement. DNN combined with GPT-2 and SentenceTransformer also show a decrease. Other models remain relatively stable with higher MAE values around 0.6, indicating less improvement.

Supplementary Fig.35. Comparison of mean squared error (MSE) across models for droplet normalized water inlet

Supplementary Fig.35 presents a detailed comparison of 16 models evaluated over 15 iterations, using mean squared error (MSE) as the performance metric. Combination of deep neural network (DNN) with DistilBERT starts at 0.2 and decreases to approximately 0.02, highlighting strong performance and learning. DNN integrated with GPT-2 and SentenceTransformer show a gradual decrease to below 0.1, indicating moderate improvement. The rest of the models maintain higher MSE values between 0.4 and 0.5.

Supplementary Fig.36. Comparison of coefficient of determination (R²) across models for droplet normalized water inlet

Supplementary Fig.36 presents a detailed comparison of 16 models evaluated over 15 iterations, using coefficient of determination (R²) as the performance metric. Combination of deep neural network (DNN) with DistilBERT shows a consistent increase from about 0.6 to nearly 1.0, indicating an excellent generalization over repetitions. DNN integrated with GPT-2 and SentenceTransformer increase to around 0.9, reflecting good predictive capability. Other models exhibit minimal change, maintaining lower R² values below 0.3.

Supplementary Fig.37. Comparison of root mean squared error (RMSE) across models for droplet normalized water inlet

Supplementary Fig.37 presents a detailed comparison of 16 models evaluated over 15 iterations, using root mean squared error (RMSE) as the performance metric. Combination of deep neural network (DNN) with DistilBERT decreases from around 0.4 to about 0.05, showing strong predictive accuracy. DNN integrated with GPT-2 and SentenceTransformer decrease to approximately 0.2, reflecting moderate accuracy improvement. Remaining models stay from 0.6 to 0.7, indicating less accuracy.

Overall, combination of DNN with DistilBERT consistently outperforms others across all metrics, showing significant improvement and accuracy. DNN integrated with GPT-2 and SentenceTransformer show moderate improvements, while other models remain relatively stable with less accuracy.

| Droplet Normalized Water Inlet | | | | |
| --- | --- | --- | --- | --- |
| Model | Metrics | | | |
| MAE | MSE | RMSE | R² |
| DNN | 0.5245 ± 0.0044 | 0.405 ± 0.0051 | 0.6482 ± 0.005 | 0.1897 ± 0.0096 |
| DNN-DistilBERT | 0.0416 ± 0.0071 | 0.0147 ± 0.0049 | 0.0534 ± 0.0089 | 0.9697 ± 0.0102 |
| DNN-OpenGPT-2 | 0.4752 ± 0.0228 | 0.3299 ± 0.0279 | 0.5686 ± 0.0257 | 0.3254 ± 0.0574 |
| DNN-SentenceTransformer | 0.5314 ± 0.0093 | 0.3975 ± 0.0127 | 0.6297 ± 0.0103 | 0.3588 ± 0.0467 |
| LightGBM | 0.5683 ± 0.0034 | 0.4555 ± 0.011 | 0.6744 ± 0.0083 | 0.0689 ± 0.0086 |
| LightGBM-DistilBERT | 0.5876 ± 0.0088 | 0.4696 ± 0.0035 | 0.6847 ± 0.0027 | 0.0424 ± 0.0058 |
| LightGBM-OpenGPT-2 | 0.5753 ± 0.003 | 0.456 ± 0.0062 | 0.6744 ± 0.0041 | 0.0713 ± 0.0039 |
| LightGBM-SentenceTransformer | 0.5883 ± 0.0031 | 0.4758 ± 0.0039 | 0.6891 ± 0.003 | 0.0297 ± 0.0051 |
| SVM | 0.5514 ± 0.0032 | 0.4418 ± 0.0043 | 0.6637 ± 0.0031 | 0.0956 ± 0.0131 |
| SVM-DistilBERT | 0.5845 ± 0.0031 | 0.4708 ± 0.0037 | 0.6854 ± 0.0027 | 0.0401 ± 0.0036 |
| SVM-OpenGPT-2 | 0.5753 ± 0.0087 | 0.4606 ± 0.0108 | 0.6782 ± 0.008 | 0.0612 ± 0.0086 |
| SVM-SentenceTransformer | 0.5905 ± 0.0033 | 0.478 ± 0.007 | 0.691 ± 0.0048 | 0.0249 ± 0.0042 |
| XGBoost | 0.554 ± 0.003 | 0.4338 ± 0.0067 | 0.657 ± 0.0041 | 0.1158 ± 0.0065 |
| XGBoost-DistilBERT | 0.5894 ± 0.0063 | 0.4734 ± 0.0038 | 0.6874 ± 0.0028 | 0.0327 ± 0.0116 |
| XGBoost-OpenGPT-2 | 0.5847 ± 0.0101 | 0.4683 ± 0.0139 | 0.6836 ± 0.0101 | 0.0424 ± 0.0088 |
| XGBoost-SentenceTransformer | 0.5892 ± 0.0032 | 0.4749 ± 0.0038 | 0.6883 ± 0.0028 | 0.0312 ± 0.0061 |

Supplementary table 6. Metrics evaluation across models for droplet normalized water inlet

Supplementary table 6 presents a comprehensive evaluation of machine learning models (DNN, LightGBM, SVM, XGBoost) paired with various natural language processing models (DistilBERT, OpenGPT-2, SentenceTransformer), based on performance metrics such as mean absolute error (MAE), mean squared error (MSE), root mean squared error (RMSE), and R². The DNN-DistilBERT model stands out with significantly lower MAE (0.0416) and a high R² (0.9697), indicating excellent predictive performance and minimal error. The standard errors are generally low, ensuring the reliability of these measurements. DNN-OpenGPT-2 and DNN-SentenceTransformer configurations reveal moderate performance. These results highlight the importance of selecting appropriate embeddings to enhance model performance.

2.8 Droplet Orifice Width

Supplementary Fig.38. Comparison of mean absolute error (MAE) across models for droplet orifice width

Supplementary Fig.38 presents a detailed comparison of 16 models evaluated over 15 iterations, using mean absolute error (MAE) as the performance metric. The deep neural network (DNN) paired with DistilBERT and SentenceTransformer starts at approximately 6 and decreases to about 2 by the 15th repetition, indicating significant improvement. DNN paired with GPT-2 starts at 20 and decreases to below 15, showing moderate improvement. Other models remain relatively stable above 20, suggesting poorer performance.

Supplementary Fig.39. Comparison of mean squared error (MSE) across models for droplet orifice width

Supplementary Fig.39 presents a detailed comparison of 16 models evaluated over 15 iterations, using mean squared error (MSE) as the performance metric. The deep neural network (DNN) paired with DistilBERT and SentenceTransformer begins at around 100 and decreases to approximately 20, showing strong performance improvement. DNN paired with GPT-2 starts around 600 and decreases to 300, reflecting moderate improvement. Other models remain stable around above 600, showing little improvement.

Supplementary Fig.40. Comparison of coefficient of determination (R²) across models for droplet orifice width

Supplementary Fig.40 presents a detailed comparison of 16 models evaluated over 15 iterations, using coefficient of determination (R²) as the performance metric. The deep neural network (DNN) paired with DistilBERT and SentenceTransformer increases from about 0.9 to nearly 1.0, indicating a strong fit over repetitions. DNN paired with GPT-2 increases from around 0.5 to below 0.8, showing moderate improvement. Other models remain relatively stable around 0.2 to 0.5, indicating limited generalization capability.

Supplementary Fig.41. Comparison of root mean squared error (RMSE) across models for droplet orifice width

Supplementary Fig.41 presents a detailed comparison of 16 models evaluated over 15 iterations, using root mean squared error (RMSE) as the performance metric. The deep neural network (DNN) paired with DistilBERT and SentenceTransformer decreases from around 10 to about 2, showing high predictive accuracy improvement. DNN paired with GPT-2 decreases from 25 to below 20, indicating moderate accuracy improvement. Other models remain around 30, showing less improvement.

Overall, DNN paired with DistilBERT and SentenceTransformer shows the best performance across all metrics. DNN paired with GPT-2 shows moderate enhancement. Other models remain less accurate.

| Droplet Orifice Width | | | | |
| --- | --- | --- | --- | --- |
| Model | Metrics | | | |
| MAE | MSE | RMSE | R² |
| DNN | 20.6718 ± 0.187 | 644.365 ± 7.0814 | 25.4474 ± 0.2044 | 0.4977 ± 0.0122 |
| DNN-DistilBERT | 1.0451 ± 0.159 | 8.8175 ± 4.0448 | 1.4343 ± 0.2123 | 0.993 ± 0.0032 |
| DNN-OpenGPT-2 | 15.54 ± 0.2969 | 546.5903 ± 21.9155 | 23.2854 ± 0.468 | 0.58 ± 0.0167 |
| DNN-SentenceTransformer | 1.6437 ± 0.2239 | 17.8457 ± 5.7285 | 3.3031 ± 0.4495 | 0.9859 ± 0.0046 |
| LightGBM | 20.1259 ± 0.1836 | 701.2015 ± 12.0877 | 26.4633 ± 0.2712 | 0.4585 ± 0.0092 |
| LightGBM-DistilBERT | 26.8097 ± 0.215 | 999.263 ± 18.4334 | 31.5847 ± 0.2024 | 0.2297 ± 0.0055 |
| LightGBM-OpenGPT-2 | 23.007 ± 0.3073 | 779.87 ± 9.9273 | 27.9572 ± 0.5699 | 0.3977 ± 0.0059 |
| LightGBM-SentenceTransformer | 27.5022 ± 0.1702 | 1059.647 ± 11.5529 | 32.5039 ± 0.1772 | 0.1847 ± 0.006 |
| SVM | 20.3261 ± 0.1363 | 677.1053 ± 9.1912 | 25.9802 ± 0.3626 | 0.4775 ± 0.0087 |
| SVM-DistilBERT | 26.2719 ± 0.1412 | 1024.2027 ± 12.0929 | 31.8909 ± 0.1632 | 0.2118 ± 0.0111 |
| SVM-OpenGPT-2 | 22.5483 ± 0.1602 | 798.3176 ± 16.118 | 28.2438 ± 0.2892 | 0.3815 ± 0.0083 |
| SVM-SentenceTransformer | 27.7382 ± 0.2257 | 1105.8276 ± 25.6404 | 32.9875 ± 0.1775 | 0.158 ± 0.0072 |
| XGBoost | 21.0796 ± 0.1929 | 674.9371 ± 11.185 | 25.9121 ± 0.2222 | 0.4811 ± 0.007 |
| XGBoost-DistilBERT | 26.9642 ± 0.2995 | 1020.3485 ± 8.439 | 31.8687 ± 0.2112 | 0.2235 ± 0.0148 |
| XGBoost-OpenGPT-2 | 23.4776 ± 0.1405 | 807.3917 ± 10.2222 | 28.3806 ± 0.1931 | 0.3762 ± 0.0085 |
| XGBoost-SentenceTransformer | 27.5833 ± 0.1428 | 1064.3121 ± 36.653 | 32.5731 ± 0.575 | 0.1787 ± 0.0073 |

Supplementary table 7. Metrics evaluation across models for droplet orifice width

Supplementary table 7 presents a comprehensive evaluation of machine learning models (DNN, LightGBM, SVM, XGBoost) paired with various natural language processing models (DistilBERT, OpenGPT-2, SentenceTransformer), based on performance metrics such as mean absolute error (MAE), mean squared error (MSE), root mean squared error (RMSE), and R². Notably, the DNN-DistilBERT model demonstrates superior performance with a remarkably low MAE of 1.0451 and an R² of 0.993, indicating high predictive accuracy. In contrast, other models, especially when enhanced with SentenceTransformer embeddings, exhibit higher error rates and significantly lower R² values. The LightGBM and SVM models, when combined with DistilBERT, show suboptimal results, with high MSE and RMSE values. These results highlight the importance of selecting appropriate embeddings to enhance model performance.

3. Selective learning curves demonstrate a good fit of deep neural network (DNN) models.

Fig.42 Learning curve for DNN-DistilBERT model for droplet diameter

Fig.43 Learning curve for DNN-DistilBERT model for droplet generation rate

Fig.44 Learning curve for DNN-DistilBERT model for droplet regime
